# Supplementary material for: Accelerating the Development of Heat Tolerant Tomato Hybrids through a Multi-Traits Evaluation of Parental Lines Combining Phenotypic and Genotypic Analysis
Source: MDPI journal article supplement (doi:10.3390/plants10102168), 2021-10-13
Supplement: s1 [file s1]

**Table 2.** Phenotypic data of 15 parental genotypes evaluated in 2019. TNF, no. fruit per plant; FW, fruit weight; YP, yield per plant; TSSC, total soluble solid content; TA, titratable acidity; CA, citric acid.

| Genotype | TNF (no.) |       | FW (g) |      | YP (kg/pt) |      | TSSC (°Brix) |      | TA (g CA/100 g FW) |      | TSSC/TA |      |
|----------|-----------|-------|--------|------|------------|------|--------------|------|--------------------|------|---------|------|
|          | mean      | SE    | mean   | SE   | mean       | SE   | mean         | SE   | mean               | SE   | mean    | SE   |
| E7       | 151.09    | 10.93 | 23.94  | 0.24 | 3.47       | 0.21 | 4.95         | 0.24 | 0.50               | 0.21 | 9.99    | 0.94 |
| E11      | 16.71     | 5.01  | 70.40  | 3.06 | 1.18       | 0.35 | 3.97         | 0.09 | 0.34               | 0.14 | 12.10   | 0.74 |
| E20      | 150.83    | 7.54  | 24.38  | 0.22 | 3.55       | 0.31 | 5.02         | 0.09 | 0.55               | 0.22 | 9.37    | 0.47 |
| E36      | 189.58    | 23.65 | 24.22  | 0.40 | 4.28       | 0.58 | 5.38         | 0.14 | 0.48               | 0.28 | 11.81   | 4.83 |
| E42      | 134.97    | 25.67 | 13.67  | 0.37 | 1.85       | 0.37 | 4.90         | 0.15 | 0.33               | 0.14 | 13.55   | 0.73 |
| E45      | 29.62     | 5.80  | 56.40  | 1.15 | 1.66       | 0.30 | 5.37         | 0.62 | 0.26               | 0.11 | 18.53   | 7.59 |
| E48      | 205.75    | 5.77  | 21.89  | 0.29 | 4.26       | 0.13 | 5.48         | 0.15 | 0.45               | 0.18 | 11.85   | 0.30 |
| E55      | 119.35    | 9.88  | 21.89  | 0.44 | 2.37       | 0.25 | 5.17         | 0.30 | 0.62               | 0.25 | 10.44   | 2.21 |
| E103     | 68.79     | 7.37  | 21.68  | 0.31 | 1.40       | 0.10 | 5.77         | 0.32 | 0.74               | 0.31 | 10.13   | 2.64 |
| E109     | 25.30     | 5.26  | 58.00  | 2.23 | 1.49       | 0.37 | 4.87         | 0.15 | 0.36               | 0.15 | 14.17   | 0.87 |
| E111     | 176.71    | 21.27 | 10.84  | 0.27 | 1.73       | 0.14 | 6.72         | 0.04 | 0.63               | 0.36 | 10.92   | 4.46 |
| LA2662   | 44.04     | 1.82  | 42.67  | 2.27 | 1.87       | 0.05 | 3.70         | 0.10 | 0.55               | 0.23 | 8.46    | 1.94 |
| LA3120   | 95.95     | 3.46  | 29.73  | 1.76 | 2.84       | 0.10 | 3.63         | 0.26 | 0.57               | 0.23 | 7.94    | 2.00 |
| PDLUC    | 84.94     | 8.44  | 21.53  | 0.54 | 1.83       | 0.16 | 6.10         | 0.28 | 0.51               | 0.21 | 12.00   | 0.55 |
| PDVIT    | 381.49    | 13.84 | 8.87   | 0.21 | 2.49       | 0.51 | 8.08         | 0.07 | 0.43               | 0.18 | 18.39   | 1.09 |
