# Supplementary material for: Accelerating the Development of Heat Tolerant Tomato Hybrids through a Multi-Traits Evaluation of Parental Lines Combining Phenotypic and Genotypic Analysis
Source: MDPI journal article supplement (doi:10.3390/plants10102168), 2021-10-13
Supplement: s1 [file s1]

**Table S9.** List of molecular markers designed for each resistance gene. The primer sequences, restriction enzymes and references are also reported.

| Gene          | Marker             | Primer pair                                                  | Enzyme         | Reference                  |
|---------------|--------------------|--------------------------------------------------------------|----------------|----------------------------|
| <i>Mi-1.2</i> | <i>Mi1.2_SCAR</i>  | FW - TGGAAAAATGTTGAATTTCTTTTG<br>RV - GCATACTATATGGCTTGTTTAC | -              | <i>Santos et al., 2020</i> |
| <i>Ph-3</i>   | <i>Ph3_CAPS</i>    | FW - TCGATCGTATGTAGACGATG<br>RV - AGGCAAATCTTGAAGAAGCA       | <i>MspI</i>    | <i>Jung et al. 2015</i>    |
| <i>Sw-5</i>   | <i>Sw5_dCAPS</i>   | FW - GACGTTGTCCCAATTGTAGGC<br>RV - CCACTTCTTCAAGTCGAGTTG     | <i>Hpy188I</i> | -                          |
| <i>Tm-2</i>   | <i>Tm-2S_SCAR</i>  | FW - TATCAACATGTCGCCCTGTGC<br>RV - AACTGTCTACCATAAAGCAGAC    | -              | -                          |
| <i>Tm-2</i>   | <i>Tm-2R_SCAR</i>  | FW - GTTATCAATATTTAGCCCTGTGC<br>RV - AACGGTCTACCGTAAAGTTGGC  | -              | -                          |
| <i>Ty-3</i>   | <i>Ty-3_CAPS</i>   | FW - TCTCAGGTGATGCTGAGCAC<br>RV - GAGAACGAAAACGAAATTTCAAAC   | <i>RsaI</i>    | <i>Kim et al. 2020</i>     |
| <i>Ve-1</i>   | <i>Ve-1_Nested</i> | FW - TTCTATCCCATATTTTCGACTG<br>RV - CATTGAGTTTATTGTTCCCAAG   | -              | -                          |
| <i>Ve-1</i>   | <i>Ve-1_dCAPS</i>  | FW - CAAGACTGGAGCTTTCTTACACT<br>RV - CGTACTCCAGCTGATTGAATG   | <i>DdeI</i>    | -                          |
