# Supplementary material for: Accelerating the Development of Heat Tolerant Tomato Hybrids through a Multi-Traits Evaluation of Parental Lines Combining Phenotypic and Genotypic Analysis
Source: MDPI journal article supplement (doi:10.3390/plants10102168), 2021-10-13
Supplement: s1 [file s1]

**Table S3.** Summary of molecular screening of resistance genes in 15 parental genotypes. The resistant (R, in red) and susceptible (S, in yellow) alleles are reported for six genes: *Mi-1.2*, *Root-knot nematode* resistance; *Ph-3*, late blight resistance; *Sw-5*, *Tomato spotted wilt virus*; *Tm-2*, *Tomato mosaic virus* resistance; *Ty-3*, *Tomato yellow leaf curl virus* resistance; *Ve-1*, *Verticillium wilt* resistance.

| GENOTYPE | RESISTANCE GENES |             |             |             |             |             |
|----------|------------------|-------------|-------------|-------------|-------------|-------------|
|          | <i>Mi-1.2</i>    | <i>Ph-3</i> | <i>Sw-5</i> | <i>Tm-2</i> | <i>Ty-3</i> | <i>Ve-1</i> |
| E7       | R                | S           | S           | S           | S           | S           |
| E11      | R                | R           | S           | S           | S           | R           |
| E20      | R                | S           | S           | S           | S           | S           |
| E36      | R                | R           | S           | S           | S           | S           |
| E42      | R                | S           | S           | S           | S           | R           |
| E45      | R                | R           | S           | S           | S           | S           |
| E48      | R                | R           | S           | S           | S           | S           |
| E55      | R                | R           | S           | S           | R           | S           |
| E103     | R                | S           | S           | R           | S           | S           |
| E109     | R                | R           | S           | S           | S           | R           |
| E111     | R                | R           | S           | S           | S           | S           |
| LA2662   | R                | S           | S           | S           | S           | S           |
| LA3120   | R                | S           | S           | S           | S           | S           |
| PDLUC    | R                | R           | S           | S           | R           | S           |
| PDVIT    | R                | S           | S           | R           | R           | S           |
