# Supplementary material for: Accelerating the Development of Heat Tolerant Tomato Hybrids through a Multi-Traits Evaluation of Parental Lines Combining Phenotypic and Genotypic Analysis
Source: MDPI journal article supplement (doi:10.3390/plants10102168), 2021-10-13
Supplement: s1 [file s1]

**Table S4.** Identity-by-state values describing the pairwise comparisons to estimate the genetic distance among the genotypes. Lower values indicated higher genetic distances. The white color indicates missing values in the analysis.

|        | E7   | E11  | E20  | E36  | E42  | E45  | E48  | E55  | E109 | PDVIT | LA2662 | LA3120 |
|--------|------|------|------|------|------|------|------|------|------|-------|--------|--------|
| E7     | 1    |      |      |      |      |      |      |      |      |       |        |        |
| E11    | 0.76 | 1    |      |      |      |      |      |      |      |       |        |        |
| E20    | 0.97 | 0.76 | 1    |      |      |      |      |      |      |       |        |        |
| E36    | 0.96 | -    | 0.96 | 1    |      |      |      |      |      |       |        |        |
| E42    | 0.66 | -    | 0.65 | 0.66 | 1    |      |      |      |      |       |        |        |
| E45    | 0.96 | 0.77 | 0.95 | 0.96 | 0.65 | 1    |      |      |      |       |        |        |
| E48    | 0.96 | 0.76 | 0.96 | 0.98 | 0.66 | 0.96 | 1    |      |      |       |        |        |
| E55    | 0.82 | 0.71 | 0.82 | 0.83 | 0.66 | 0.83 | 0.84 | 1    |      |       |        |        |
| E109   | 0.84 | 0.85 | 0.84 | -    | -    | 0.84 | 0.84 | 0.75 | 1    |       |        |        |
| PDVIT  | 0.61 | -    | 0.61 | 0.61 | 0.54 | 0.61 | 0.61 | 0.63 | -    | 1     |        |        |
| LA2662 | 0.94 | -    | 0.95 | 0.95 | 0.66 | 0.96 | 0.95 | 0.82 | -    | 0.61  | 1      |        |
| LA3120 | 0.94 | -    | 0.96 | 0.96 | 0.66 | 0.95 | 0.96 | 0.83 | -    | 0.61  | 0.95   | 1      |
