# Supplementary material for: Accelerating the Development of Heat Tolerant Tomato Hybrids through a Multi-Traits Evaluation of Parental Lines Combining Phenotypic and Genotypic Analysis
Source: MDPI journal article supplement (doi:10.3390/plants10102168), 2021-10-13
Supplement: s1 [file s1]

**Table S7.** One-way ANOVA performed for each trait and for each source of variation. FS, fruit set, TNF, no. fruit per plant; FW, fruit weight; YP, yield per plant; TSSC, total soluble solid content; TA, titratable acidity, d.f., degrees of freedom.

| Trait   | Source of variation | Sum of Square | d.f. | Mean square | F      | Sign. |
|---------|---------------------|---------------|------|-------------|--------|-------|
| FS      | Genotypes           | 8142.28       | 17   | 478.96      | 2.84   | 0.00  |
|         | Parents             | 2253.80       | 8    | 281.73      | 1.63   | 0.19  |
|         | Hybrids             | 5264.11       | 8    | 658.01      | 4.01   | 0.01  |
|         | Between             | 624.37        | 1    | 624.37      | 2.39   | 0.13  |
|         | Error               | 6073.74       | 36   | 168.71      |        |       |
|         | Total               | 14216.02      | 53   |             |        |       |
| TNF     | Genotypes           | 674599.02     | 27   | 24985.15    | 30.68  | 0.00  |
|         | Parents             | 303391.58     | 14   | 21670.83    | 46.16  | 0.00  |
|         | Hybrids             | 322643.51     | 12   | 26886.96    | 21.52  | 0.00  |
|         | Between             | 48563.94      | 1    | 48563.94    | 5.67   | 0.02  |
|         | Error               | 42347.97      | 52   | 814.38      |        |       |
|         | Total               | 716946.99     | 79   |             |        |       |
| FW      | Genotypes           | 24601.41      | 27   | 911.16      | 132.72 | 0.00  |
|         | Parents             | 14183.96      | 14   | 1013.14     | 202.09 | 0.00  |
|         | Hybrids             | 10384.25      | 12   | 865.35      | 95.22  | 0.00  |
|         | Between             | 33.19         | 1    | 33.19       | 0.11   | 0.74  |
|         | Error               | 377.61        | 55   | 6.87        |        |       |
|         | Total               | 24979.01      | 82   |             |        |       |
| YP      | Genotypes           | 127.38        | 27   | 4.72        | 15.44  | 0.00  |
|         | Parents             | 44.72         | 14   | 3.19        | 11.80  | 0.00  |
|         | Hybrids             | 59.88         | 12   | 4.99        | 14.22  | 0.00  |
|         | Between             | 22.78         | 1    | 22.78       | 14.89  | 0.00  |
|         | Error               | 16.20         | 53   | 0.31        |        |       |
|         | Total               | 143.58        | 80   |             |        |       |
| TA      | Genotypes           | 0.62          | 27   | 0.02        | 8.31   | 0.00  |
|         | Parents             | 0.45          | 14   | 0.03        | 12.62  | 0.00  |
|         | Hybrids             | 0.17          | 12   | 0.01        | 4.75   | 0.01  |
|         | Between             | 0.00          | 1    | 0.00        | 0.00   | 0.96  |
|         | Error               | 0.07          | 24   | 0.00        |        |       |
|         | Total               | 0.68          | 51   |             |        |       |
| Brix    | Genotypes           | 84.09         | 27   | 3.11        | 20.90  | 0.00  |
|         | Parents             | 54.99         | 14   | 3.93        | 21.95  | 0.00  |
|         | Hybrids             | 27.23         | 12   | 2.27        | 20.06  | 0.00  |
|         | Between             | 1.88          | 1    | 1.88        | 1.68   | 0.20  |
|         | Error               | 8.20          | 55   | 0.15        |        |       |
|         | Total               | 92.29         | 82   |             |        |       |
| TSSC/TA | Genotypes           | 553.55        | 27   | 20.50       | 4.18   | 0.00  |
|         | Parents             | 368.35        | 14   | 26.31       | 4.85   | 0.00  |
|         | Hybrids             | 185.05        | 12   | 15.42       | 3.59   | 0.00  |
|         | Between             | 0.15          | 1    | 0.15        | 0.01   | 0.91  |
|         | Error               | 245.14        | 50   | 4.90        |        |       |
|         | Total               | 798.69        | 77   |             |        |       |
