# Supplementary material for: Accelerating the Development of Heat Tolerant Tomato Hybrids through a Multi-Traits Evaluation of Parental Lines Combining Phenotypic and Genotypic Analysis
Source: MDPI journal article supplement (doi:10.3390/plants10102168), 2021-10-13
Supplement: s1 [file s1]

**Table S1.** Phenotypic data of selected parental genotypes evaluated in 2017. FS, fruit set; TNF, no. fruit per plant; FW, fruit weight; YP, yield per plant are reported.

| CAMPANIA 2017 |        |       |           |       |        |       |            |      |           |
|---------------|--------|-------|-----------|-------|--------|-------|------------|------|-----------|
| Genotype      | FS (%) |       | TNF (no.) |       | FW (g) |       | YP (kg/pt) |      | Reference |
|               | Mean   | SE    | Mean      | SE    | Mean   | SE    | Mean       | SE   |           |
| E7            | 71.90  | 3.50  | 35.84     | 16.06 | 29.51  | 1.38  | 1.42       | 0.77 | [6]       |
| E11           | 34.72  | 0.14  | 37.13     | 0.89  | 77.37  | 10.12 | 2.86       | 0.32 |           |
| E20           | 25.89  | 7.44  | 57.60     | 9.50  | 29.35  | 3.83  | 2.24       | 0.46 |           |
| E36           | 69.65  | 3.99  | 87.31     | 10.93 | 26.07  | 0.84  | 2.52       | 0.12 | [6]       |
| E42           | 60.45  | 4.53  | 304.18    | 8.07  | 11.27  | 0.07  | 3.43       | 0.07 | [6]       |
| E45           | 56.35  | 5.84  | 62.27     | 11.92 | 40.95  | 13.69 | 2.79       | 0.44 | [6]       |
| E48           | 5.84   | 3.20  | 61.67     | 5.22  | 25.45  | 1.42  | 1.56       | 0.12 |           |
| E55           | 62.04  | 2.09  | 45.76     | 4.54  | 16.63  | 0.94  | 0.76       | 0.10 |           |
| E103          | 53.23  | 11.60 | 52.32     | 9.72  | 28.56  | 3.50  | 1.05       | 0.17 |           |
| E109          | 42.85  | 8.59  | 58.78     | 6.47  | 58.17  | 3.37  | 2.93       | 0.27 |           |
| E111          | 51.74  | 12.62 | 56.98     | 9.94  | 31.08  | 3.83  | 1.18       | 0.19 |           |
| LA2662        | 56.06  | 7.94  | 55.46     | 3.04  | 49.65  | 4.27  | 2.78       | 0.38 |           |
| LA3120        | 63.47  | 1.93  | 179.63    | 29.75 | 24.35  | 3.54  | 3.25       | 0.57 |           |
| PDVIT         | 47.55  | 2.09  | 94.50     | 1.44  | 9.90   | 1.75  | 0.43       | 0.19 |           |
| Mean          | 50.12  |       | 84.96     |       | 32.74  |       | 2.09       |      |           |
| Dev.st        | 18.00  |       | 72.62     |       | 18.49  |       | 0.99       |      |           |
| PUGLIA 2017   |        |       |           |       |        |       |            |      |           |
| Genotype      | FS (%) |       | TNF (no.) |       | FW (g) |       | YP (kg/pt) |      | Reference |
|               | Mean   | SE    | Mean      | SE    | Mean   | SE    | Mean       | SE   |           |
| E7            | 61.21  | 5.94  | 161.53    | 13.04 | 24.68  | 2.68  | 3.99       | 0.57 | [6]       |
| E11           | 38.38  | 10.44 | 164.85    | 15.95 | 41.95  | 7.57  | 3.22       | 0.19 |           |
| E20           | 43.47  | 6.00  | 100.58    | 16.81 | 29.57  | 2.49  | 5.46       | 0.77 |           |
| E36           | 55.72  | 5.48  | 254.27    | 39.78 | 22.82  | 2.24  | 5.67       | 0.58 | [6]       |
| E42           | 25.84  | 0.29  | 417.25    | 47.32 | 10.20  | 0.67  | 4.22       | 0.39 | [6]       |
| E45           | 39.54  | 14.97 | 76.00     | 23.24 | 36.70  | 5.75  | 1.53       | 0.16 | [6]       |
| E48           | 42.21  | 7.36  | 170.60    | 4.42  | 21.61  | 0.97  | 3.69       | 0.24 |           |
| E55           | 49.13  | 5.35  | 181.43    | 19.57 | 19.51  | 2.65  | 3.44       | 0.09 |           |
| E103          | 53.46  | 16.04 | 70.15     | 11.23 | 29.63  | 3.24  | 1.44       | 0.20 |           |
| E109          | 30.91  | 0.52  | 64.06     | 20.52 | 60.11  | 26.07 | 5.40       | 0.46 |           |
| E111          | 42.73  | 15.85 | 85.19     | 13.26 | 37.12  | 4.76  | 1.89       | 0.27 |           |
| LA2662        | 54.22  | 2.58  | 112.17    | 19.99 | 49.29  | 3.62  | 4.28       | 0.47 |           |
| LA3120        | 43.50  | 5.78  | 229.18    | 12.48 | 25.84  | 3.81  | 3.77       | 0.64 |           |
| PDVIT         | 57.67  | 7.40  | 227.23    | 22.94 | 12.99  | 1.40  | 2.98       | 0.51 |           |
| Mean          | 45.57  |       | 165.32    |       | 30.14  |       | 3.64       |      |           |
| Dev.st        | 10.24  |       | 96.21     |       | 13.80  |       | 1.37       |      |           |
