# Supplementary material for: Accelerating the Development of Heat Tolerant Tomato Hybrids through a Multi-Traits Evaluation of Parental Lines Combining Phenotypic and Genotypic Analysis
Source: MDPI journal article supplement (doi:10.3390/plants10102168), 2021-10-13
Supplement: s1 [file s1]

**Table S6.** Phenotypic data of 13 F<sub>1</sub> hybrids evaluated in 2019. FS, fruit set; TNF, no. fruit per plant; FW, fruit weight; YP, yield per plant; TSSC, total soluble solid content; TA, titratable acidity; CA, citric acid.

| F <sub>1</sub><br>hybrid | TNF (no.) |       | FW (g) |      | YP (kg/pt) |      | TSSC (°Brix) |      | TA (g CA/100 g FW) |      | TSSC/TA |      |
|--------------------------|-----------|-------|--------|------|------------|------|--------------|------|--------------------|------|---------|------|
|                          | mean      | SE    | mean   | SE   | mean       | SE   | mean         | SE   | mean               | SE   | mean    | SE   |
| 17H14                    | 262.65    | 26.97 | 12.89  | 0.41 | 3.22       | 0.29 | 6.98         | 0.17 | 0.53               | 0.22 | 13.21   | 0.72 |
| 17H25                    | 288.46    | 37.41 | 13.40  | 2.01 | 4.07       | 0.66 | 6.22         | 0.13 | 0.57               | 0.23 | 10.37   | 0.38 |
| 17H36                    | 70.97     | 6.54  | 15.79  | 1.94 | 1.23       | 0.14 | 5.73         | 0.20 | 0.53               | 0.22 | 10.65   | 0.51 |
| 17H37                    | 204.92    | 9.79  | 25.07  | 0.37 | 4.98       | 0.35 | 5.75         | 0.10 | 0.52               | 0.21 | 11.52   | 0.30 |
| 17H39                    | 175.46    | 5.17  | 27.44  | 1.22 | 4.57       | 0.34 | 5.87         | 0.09 | 0.52               | 0.22 | 11.89   | 0.70 |
| 17H56                    | 159.77    | 12.57 | 26.67  | 1.25 | 4.15       | 0.17 | 5.77         | 0.22 | 0.67               | 0.38 | 10.65   | 4.46 |
| 17H57                    | 290.08    | 33.83 | 19.27  | 0.18 | 4.57       | 0.37 | 6.47         | 0.14 | 0.53               | 0.30 | 11.05   | 4.55 |
| 18H13                    | 126.16    | 9.72  | 20.57  | 0.57 | 2.55       | 0.19 | 5.25         | 0.05 | 0.51               | 0.21 | 10.39   | 0.27 |
| 18H17                    | 290.92    | 32.46 | 19.89  | 0.22 | 5.39       | 0.46 | 5.78         | 0.09 | 0.53               | 0.22 | 11.20   | 0.32 |
| 18H48                    | 30.10     | 5.40  | 64.47  | 4.87 | 1.92       | 0.32 | 5.60         | 0.47 | 0.32               | 0.13 | 18.17   | 2.17 |
| 18H56                    | 54.78     | 3.67  | 64.07  | 1.45 | 3.45       | 0.31 | 3.87         | 0.15 | 0.42               | 0.18 | 9.81    | 1.11 |
| 18H57                    | 53.63     | 0.82  | 34.40  | 0.70 | 1.85       | 0.07 | 3.85         | 1.57 | 0.36               | 0.15 | 10.61   | 4.33 |
| 18H59                    | 70.56     | 3.47  | 31.73  | 0.67 | 2.24       | 0.12 | 4.77         | 0.20 | 0.41               | 0.17 | 14.50   | 2.82 |
