# Supplementary material for: Accelerating the Development of Heat Tolerant Tomato Hybrids through a Multi-Traits Evaluation of Parental Lines Combining Phenotypic and Genotypic Analysis
Source: MDPI journal article supplement (doi:10.3390/plants10102168), 2021-10-13
Supplement: s1 [file s1]

**Table S8.** Parental genotypes used in the crossing schemes for the constitution of F<sub>1</sub> hybrids. Experiment trials: C16, Campania 2016, C17, Campania 2017, C19, Campania 2019, P16, Puglia 2016, P17, Puglia 2017. Selected trait: HT, Heat-tolerance, Q, Quality.

| Code   | Origin        | Common Name             | Habitus       | Experiment trials       | Selected trait |
|--------|---------------|-------------------------|---------------|-------------------------|----------------|
| E7     | ITALY         | Corbarino PC04          | Indeterminate | C16, P16, C17, P17, C19 | HT             |
| E11    | ITALY         | Fabrizio                | Determinate   | C16, P16, C17, P17, C19 | HT             |
| E20    | ITALY         | Pizzutello              | Indeterminate | C16, P16, C17, P17, C19 | HT/Q           |
| E36    | ITALY         | Seccagno                | Indeterminate | C16, P16, C17, P17, C19 | HT             |
| E42    | ITALY         | PI15250                 | Determinate   | C16, P16, C17, P17, C19 | HT/Q           |
| E45    | ITALY         | SM246                   | Determinate   | C16, P16, C17, P17, C19 | HT/Q           |
| E48    | ITALY         | Vesuvio 2001            | Indeterminate | C16, P16, C17, P17, C19 | HT/Q           |
| E55    | SOUTH AMERICA | Latin american cultivar | Indeterminate | C16, P16, C17, P17, C19 | HT/Q           |
| E103   | USA           | Mini Red Current        | Indeterminate | C16, P16, C19           | Q              |
| E109   | EUROPE        | V-L-101, Spain          | Determinate   | C16, P16, C17, P17, C19 | HT             |
| E111   | USA           | Black cherry            | Indeterminate | C16, P16, C19           | Q              |
| LA2662 | USA           | Saladette               | Determinate   | C17, P17, C19           | HT             |
| LA3120 | USA           | Malintka 101            | Determinate   | C17, P17, C19           | HT             |
| PDLUC  | ITALY         | Lucariello              | Indeterminate | C19                     | Q              |
| PDVIT  | ITALY         | Cannellino Vitiello     | Indeterminate | C17, P17, C19           | HT/Q           |
