# Supplementary material for: Accelerating the Development of Heat Tolerant Tomato Hybrids through a Multi-Traits Evaluation of Parental Lines Combining Phenotypic and Genotypic Analysis
Source: Plants (Basel). 2021 Oct 13;10(10):2168. doi: 10.3390/plants10102168 (PMC8539001; doi:10.3390/plants10102168)
Supplement: Supplementary file 1 [file plants-10-02168-s001.zip]

Archive with 12 entries (12 files):
- Figure S1.pptx
- Figure S2.pptx
- Figure S3.pptx
- Table S1.pdf
- Table S2.pdf
- Table S3.pdf
- Table S4.pdf
- Table S5.xlsx
- Table S6.pdf
- Table S7.pdf
- Table S8.pdf
- Table S9.pdf
