# Supplementary material for: Accelerating the Development of Heat Tolerant Tomato Hybrids through a Multi-Traits Evaluation of Parental Lines Combining Phenotypic and Genotypic Analysis
Source: Plants (Basel). 2021 Oct 13;10(10):2168. doi: 10.3390/plants10102168 (PMC8539001; doi:10.3390/plants10102168)
Supplement: Supplementary file 1 [file plants-10-02168-s001.zip › Table S5.xlsx]

## Sheet: Foglio1
Table S5. Overview of the number of SNPs mapping on genes involved in the response to resistance diseases. The number of SNPs were grouped based on the categorical classification of the impact of the mutation.
Dataset	HIGH	MODERATE	LOW	MODIFIER	Total Loci	Affected genes
SolCAP	4 (2.11 %)	60 (31.58 %)	79 (41.58 %)	47 (24.74 %)	190	111
ddRAD	0 (0 %)	11 (1.93 %)	12 (2.10 %)	548 (95.97 %)	571	186
Total	4 (0.53 %)	71 (9.33 %)	91 (11.96 %)	595 (78.19 %)	761	279
						(18 common genes)
